# Supplementary material for: Implementation of aerosol–cloud interactions in the regional atmosphere–aerosol model COSMO-MUSCAT(5.0) and evaluation using satellite data
Source: Copernicus journal article supplement (doi:10.5194/gmd-10-2231-2017), 2017-06-20
Supplement: Supplementary file 1 [file gmd-10-2231-2017-supplement.pdf]

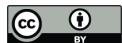

*Supplement of*

## **Implementation of aerosol–cloud interactions in the regional atmosphere–aerosol model COSMO-MUSCAT(5.0) and evaluation using satellite data**

**Sudhakar Dipu et al.**

*Correspondence to:* Sudhakar Dipu ([dipu.sudhakar@uni-leipzig.de](mailto:dipu.sudhakar@uni-leipzig.de))

The copyright of individual parts of the supplement might differ from the CC BY 3.0 License.

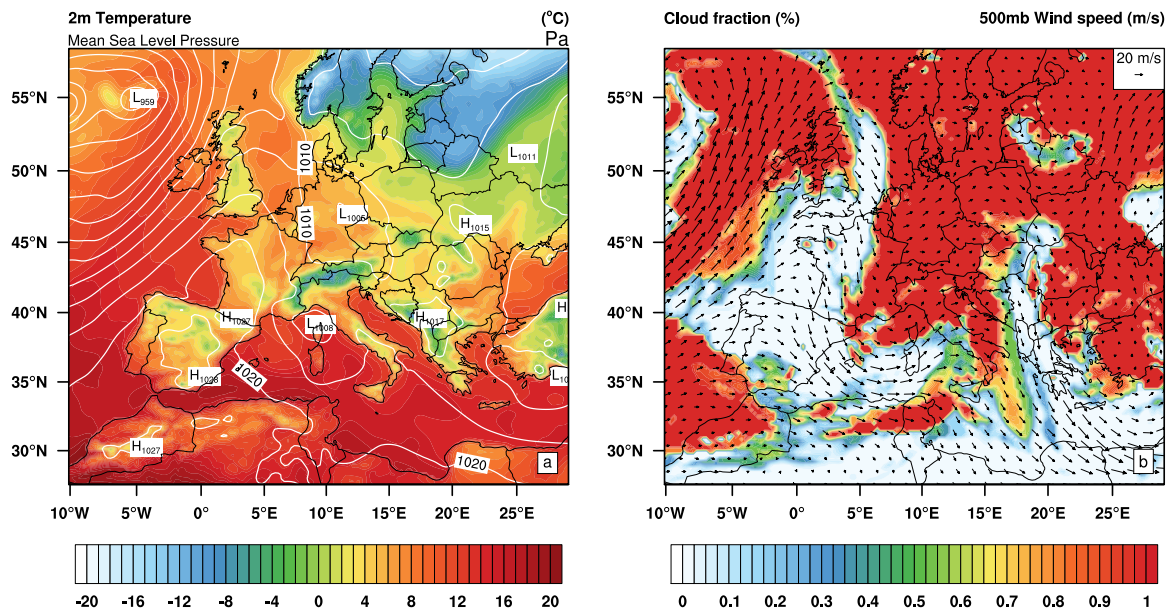

**Figure S1.** Model synoptic conditions for 15 February 2007 at 00:00 UTC, (a) Surface pressure in contours and 2m (°C) as colour shading, (b) 500 mb wind vectors and total cloud area fraction as colour shading.
